# Supplementary material
Source: PubMed Central journal article supplement (PMC2517647)
Supplement: neo1009_1014SD1.pdf [file neo1009_1014SD1.pdf]

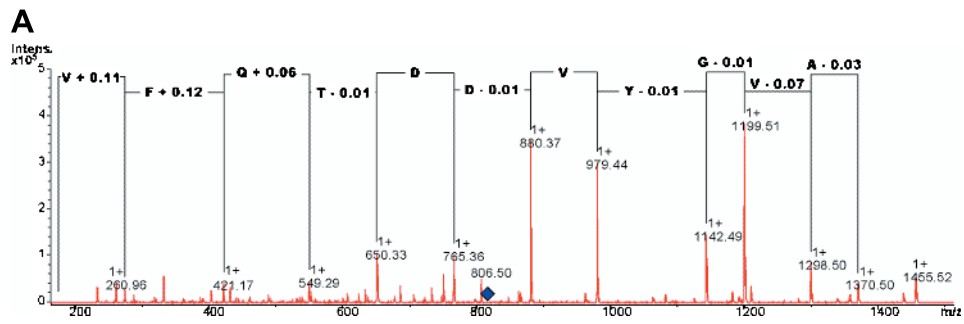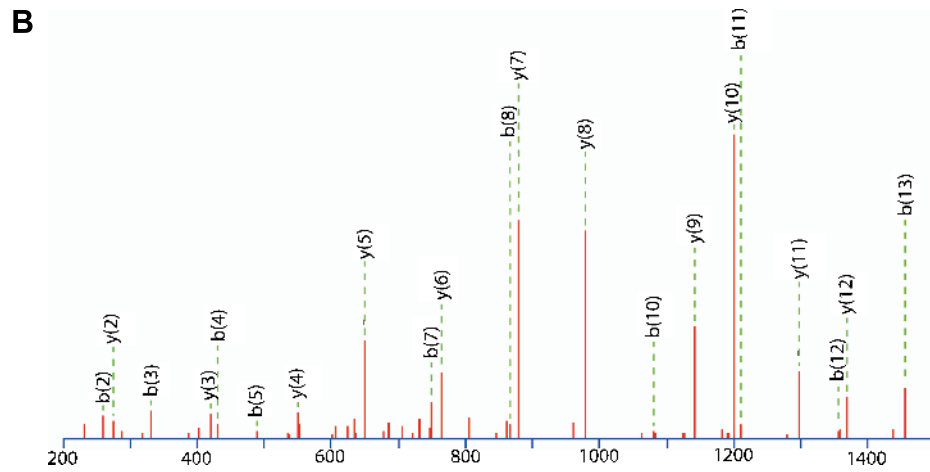

**C**

| #  | b        | Seq. | y        | #  |
|----|----------|------|----------|----|
| 1  | 148.076  | F    |          | 14 |
| 2  | 261.160  | I    | 1482.759 | 13 |
| 3  | 332.197  | A    | 1369.675 | 12 |
| 4  | 431.265  | V    | 1298.638 | 11 |
| 5  | 488.287  | G    | 1199.569 | 10 |
| 6  | 651.350  | Y    | 1142.548 | 9  |
| 7  | 750.418  | V    | 979.484  | 8  |
| 8  | 865.445  | D    | 880.416  | 7  |
| 9  | 980.472  | D    | 765.389  | 6  |
| 10 | 1081.520 | T    | 650.362  | 5  |
| 11 | 1209.579 | Q    | 549.314  | 4  |
| 12 | 1356.647 | F    | 421.256  | 3  |
| 13 | 1455.715 | V    | 274.187  | 2  |
| 14 |          | R    | 175.119  | 1  |

**Figure W1.** (A) Manually annotated MS/MS fragmentation spectrum of the peptide FIAVGYVDDTQFVR (from the doubly charged parent peptide at  $m/z$  815.348, blue diamond), identifying human HLA class I histocompatibility antigen, followed by the MS/MS fragmentation spectrum annotated by the Mascot software (B). The table below the fragmentation spectra (C) shows ions from the b and y series.

**Table W1.** Sequences, Scores, and Total Number of Peptides Identifying Proteins of Interest.

| Proteins of Interest | Peptides                    | MDA-MB-231: Number of Peptides (and Mascot Scores)                                  |                                                          |                                                      |                 | B02: Number of Peptides (and Mascot Scores) |                    |                |                    |
|----------------------|-----------------------------|-------------------------------------------------------------------------------------|----------------------------------------------------------|------------------------------------------------------|-----------------|---------------------------------------------|--------------------|----------------|--------------------|
|                      |                             | #1                                                                                  | #2                                                       | #3                                                   | #4              | #1                                          | #2                 | #3             | #4                 |
| CD51                 | SSASFNVIEFPYK               |                                                                                     |                                                          |                                                      | 1 (60)          |                                             |                    |                |                    |
|                      | IYIGDDNPLTLIVK              |                                                                                     |                                                          |                                                      | 2 (91; 92)      |                                             |                    |                | 1 (62)             |
|                      | AGTQLLAGLR                  |                                                                                     |                                                          |                                                      |                 | 1 (51)                                      |                    |                |                    |
|                      | STGLNAVPSQILEGQWAAR         |                                                                                     |                                                          |                                                      |                 | 1 (54)                                      |                    |                |                    |
| CD9 Kinectin         | LTPITIFMEYR                 |                                                                                     |                                                          |                                                      |                 |                                             |                    | 1 (33)         |                    |
|                      | KDVLETFTVK                  |                                                                                     |                                                          |                                                      | 1 (74)          | 1 (63)                                      | 1 (45)             | 2 (74; 61)     | 1 (70)             |
|                      | SVLAETEGILQK                |                                                                                     |                                                          | 1 (90)                                               |                 |                                             |                    |                | 2 (55; 91)         |
|                      | SVEELLEAELLK                |                                                                                     |                                                          | 1 (74)                                               |                 | 1 (33)                                      | 1 (50)             |                | 4 (45; 72; 75; 60) |
|                      | DAVSNTTNQLESK               |                                                                                     |                                                          | 1 (45)                                               |                 |                                             |                    |                | 1 (86)             |
|                      | WLQDLQFEENESLK              |                                                                                     |                                                          | 1 (62)                                               |                 |                                             |                    |                | 2 (57; 58)         |
|                      | VQELQNLK                    |                                                                                     |                                                          |                                                      |                 | 1 (61)                                      |                    |                | 1 (43)             |
|                      | AQQSLELIQSK                 |                                                                                     |                                                          |                                                      |                 | 1 (64)                                      |                    |                | 2 (38; 49)         |
|                      | IHVSYQETQQMQMK              |                                                                                     |                                                          |                                                      |                 |                                             |                    | 1 (39)         |                    |
|                      | AAGDTTVIENSVDVSPETESSEK     |                                                                                     |                                                          |                                                      |                 |                                             |                    |                | 1 (75)             |
| Prohibitin           | LSDALAVEDDQVAPVPLNVVETSSSVR |                                                                                     |                                                          |                                                      |                 | 1 (39)                                      |                    |                |                    |
|                      | FDAGELITQR                  |                                                                                     |                                                          |                                                      | 1 (70)          | 3 (32; 38; 68)                              |                    |                | 3 (75; 87; 81)     |
|                      | VLPSITTEILK                 |                                                                                     |                                                          |                                                      | 1 (46)          | 1 (39)                                      | 1 (30)             | 1 (30)         | 2 (30; 37)         |
|                      | IFTSIGEDYDER                |                                                                                     |                                                          |                                                      | 3 (60; 60; 62)  |                                             |                    | 1 (43)         | 2 (60; 42)         |
|                      | NITYLPAGQSVLLQLPQ           |                                                                                     |                                                          |                                                      | 1 (36; 62)      |                                             |                    |                | 1 (94)             |
|                      | DLQNVNITLR                  |                                                                                     |                                                          |                                                      |                 | 1 (46)                                      |                    |                | 2 (34; 76)         |
|                      | AAELIANSLATAGDGLIELR        |                                                                                     |                                                          |                                                      |                 |                                             | 1 (49)             | 3 (68; 50; 72) | 3 (112; 76; 62)    |
|                      | KLEAAEDIAYQLSR              |                                                                                     |                                                          |                                                      |                 |                                             |                    | 1 (34)         | 1 (111)            |
|                      | IPLNDLFR                    |                                                                                     |                                                          | 1 (48)                                               | 1 (66)          |                                             |                    |                | 1 (48)             |
|                      | CD107b Class I HLA          | VDLGTLR                                                                             | 1 (42)                                                   |                                                      |                 | 1 (39)                                      |                    |                |                    |
| FSDAASQR             |                             | 1 (78)                                                                              |                                                          |                                                      |                 |                                             |                    |                |                    |
| YFFTSVSR             |                             | 3 (66; 60; 56)                                                                      |                                                          |                                                      |                 | 1 (33)                                      |                    |                |                    |
| WEAAHVAEQLR          |                             | 3 (71; 31; 62)                                                                      |                                                          |                                                      |                 | 1 (51)                                      |                    |                |                    |
| MYGCDVGSWDR          |                             | 3 (47; 80; 80)                                                                      |                                                          |                                                      | 2 (57; 73)      |                                             |                    |                |                    |
| YFYTAVSR             |                             | 1 (47)                                                                              |                                                          |                                                      |                 |                                             |                    |                |                    |
| MYGCDLGPDGR          |                             | 1 (66)                                                                              |                                                          |                                                      |                 |                                             |                    |                |                    |
| WAAVVVPSGEEQR        |                             | 5 (61; 44; 61; 61; 61)                                                              | 1 (43)                                                   |                                                      | 2 (61; 62)      | 2 (40; 33)                                  |                    |                | 1 (55)             |
| SWTAADTAAQITQR       |                             | 4 (52; 63; 36; 94)                                                                  | 4 (39; 45; 50; 73)                                       | 4 (46; 36; 50; 34)                                   | 2 (91; 52)      |                                             |                    |                |                    |
| AYLEGECVEWLR         |                             |                                                                                     | 3 (69; 65; 75)                                           |                                                      |                 |                                             |                    |                |                    |
| FITVGYVDDTLFVR       |                             | 3 (111; 110; 59)                                                                    |                                                          | 3 (44; 65; 79)                                       |                 |                                             |                    |                |                    |
| MYGCDVGPDGR          |                             | 2 (68; 35)                                                                          |                                                          |                                                      |                 |                                             |                    |                |                    |
| TYLEGTCVEWLR         |                             |                                                                                     |                                                          | 1 (41)                                               |                 |                                             |                    |                |                    |
| SWTAADMAAQITTK       |                             | 2 (64; 50)                                                                          |                                                          |                                                      | 3 (96; 100; 78) |                                             |                    |                |                    |
| WAAVVVPSGQEQR        |                             | 7 (58; 39; 44; 62; 44; 32; 50)                                                      |                                                          | 8 (45; 61; 41; 37; 62; 50; 44; 44)                   | 2 (50; 50)      | 3 (39; 44; 62)                              | 4 (40; 38; 48; 44) | 1 (44)         | 1 (61)             |
| AYLEGTCVEWLR         |                             | 20 (48; 77; 78; 78; 86; 83; 74; 84; 82; 46; 89; 80; 85; 63; 86; 76; 64; 49; 61; 47) |                                                          | 1 (43)                                               |                 | 2 (71; 84)                                  |                    |                |                    |
| FIAVGYVDDTQFVR       |                             | 20 (50; 41; 83; 90; 61; 90; 97; 75; 93; 78; 90; 89; 54; 96; 90; 93; 89; 80; 65; 75) | 13 (96; 107; 98; 98; 53; 90; 57; 99; 89; 97; 90; 97; 66) | 12 (84; 102; 56; 86; 98; 97; 96; 31; 54; 98; 72; 72) | 1 (81)          | 4 (103; 92; 106; 87)                        | 1 (81)             |                |                    |

**Table W1.** (continued)

| Proteins of Interest | Peptides                  | MDA-MB-231: Number of Peptides (and Mascot Scores) |                                             |                                  |                        | B02: Number of Peptides (and Mascot Scores) |                   |    |        |
|----------------------|---------------------------|----------------------------------------------------|---------------------------------------------|----------------------------------|------------------------|---------------------------------------------|-------------------|----|--------|
|                      |                           | #1                                                 | #2                                          | #3                               | #4                     | #1                                          | #2                | #3 | #4     |
|                      | APWIEQEGPEYWDGETR         | 6 (68; 76;<br>74; 61;<br>31; 42)                   | 8 (97; 51;<br>82; 50;<br>57; 49;<br>81; 36) | 6 (40; 81;<br>79; 63;<br>81; 42) | 4 (96; 104;<br>90; 54) | 1 (60)                                      |                   |    |        |
|                      | GGSYSQAACSDSAQGSVDVSLTA   |                                                    |                                             |                                  | 2 (41; 42)             |                                             |                   |    |        |
|                      | KGGYSQAASSDSAQGSVDVSLTACK | 2 (85; 81)                                         | 2 (93; 56)                                  | 1 (42)                           | 1 (77)                 |                                             |                   |    |        |
|                      | DGEDQTQDTELVEYR           | 1 (75)                                             | 3 (72;<br>73; 81)                           |                                  |                        | 2 (33; 48)                                  |                   |    |        |
|                      | DGEDQTQDTELVEYRPAQDR      | 2 (41; 42)                                         |                                             | 1 (43)                           |                        | 2 (48; 33)                                  |                   |    |        |
|                      | DGEDQTQDTELVEYRPAQDGTQK   | 1 (56)                                             | 4 (32; 39;<br>44; 32)                       |                                  | 3 (52;<br>30; 41)      | 1 (30)                                      | 3 (31;<br>46; 33) |    | 1 (45) |
|                      | GGSYSQAASSDSAQGSVDVSLTACK |                                                    | 1 (98)                                      |                                  |                        | 1 (75)                                      |                   |    |        |
|                      | APWIEQEGPEYWDR            | 1 (65)                                             | 1 (49)                                      |                                  |                        |                                             |                   |    |        |

For each protein of interest, the total number of peptides is given for each experiment ( $n = 4$  for MDA-MB-231 and  $n = 4$  for B02 cell line, from four different MDA vs B02 analyses). The numbers in parentheses represent the Mascot scores (rounded down to the nearest number). For class I HLA, a subset of nonredundant peptides has been selected for the sake of clarity.
